# Supplementary material
Source: PubMed Central journal article supplement (PMC3039498)

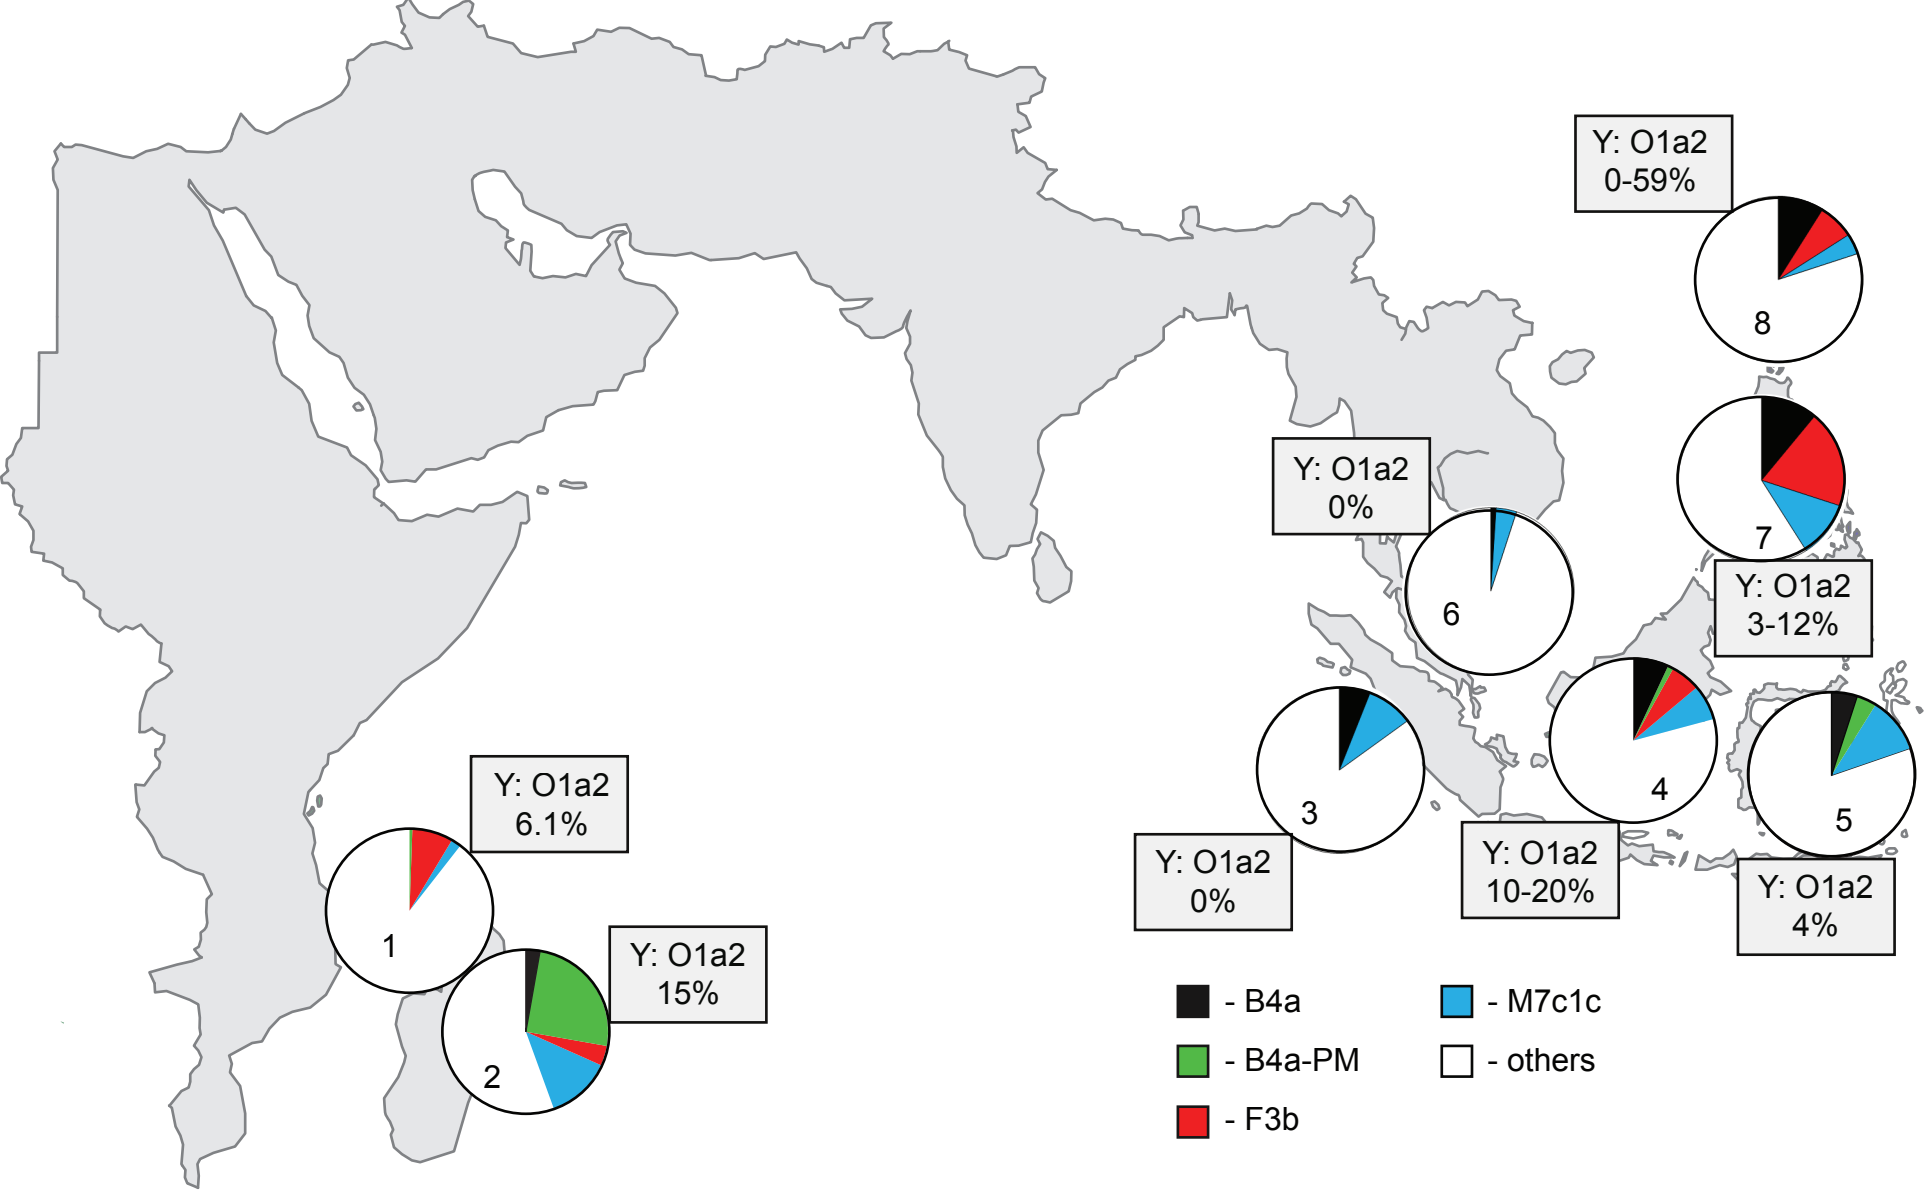

Supplement: ejhg2010128x3.pdf [file ejhg2010128x3.pdf]
